# Supplementary material for: Dietary Fat and Polyunsaturated Fatty Acid Intakes during Childhood Are Prospectively Associated with Puberty Timing Independent of Dietary Protein
Source: MDPI journal article supplement (doi:10.3390/nu14020275), 2022-01-10
Supplement: s1 [file s1]

**Table S1.** Association<sup>1</sup> of dietary saturated fatty acid (SFA) in childhood with puberty timing.

| Dietary SFA at baseline                |                 |                   |                   | <i>p</i> <sub>trend</sub> <sup>3</sup> |
|----------------------------------------|-----------------|-------------------|-------------------|----------------------------------------|
| T1 <sup>2</sup>                        | T2 <sup>2</sup> | T3 <sup>2</sup>   |                   |                                        |
| <b>Girls</b>                           |                 |                   |                   |                                        |
| <b>Age at Tanner stage B2 (n=2185)</b> |                 |                   |                   |                                        |
| Unadjusted model:                      | 1               | 1.04 (0.86, 1.16) | 1.05 (0.97, 1.21) | 0.07                                   |
| Model 2 <sup>4</sup> :                 | 1               | 1.02 (0.82, 1.17) | 1.03 (0.95, 1.23) | 0.06                                   |
| Final model <sup>5</sup> :             | 1               | 1.05 (0.98, 1.21) | 1.07 (0.98, 1.19) | 0.06                                   |
| <b>Age at menarche (n=3425)</b>        |                 |                   |                   |                                        |
| Unadjusted model:                      | 1               | 0.95 (0.79, 1.15) | 0.99 (0.87, 1.19) | 0.06                                   |
| Model 2 <sup>6</sup> :                 | 1               | 0.99 (0.80, 1.19) | 1.04 (0.91, 1.22) | 0.053                                  |
| Final model <sup>5</sup> :             | 1               | 1.04 (0.92, 1.25) | 1.08 (0.95, 1.25) | 0.07                                   |
| <b>Boys</b>                            |                 |                   |                   |                                        |
|                                        | T1 <sup>7</sup> | T2 <sup>7</sup>   | T3 <sup>7</sup>   | <i>p</i> <sub>trend</sub> <sup>3</sup> |
| <b>Age at Tanner stage G2 (n=2495)</b> |                 |                   |                   |                                        |
| Unadjusted model:                      | 1               | 0.92 (0.75, 1.13) | 0.98 (0.85, 1.17) | 0.08                                   |
| Model 2 <sup>6</sup> :                 | 1               | 0.96 (0.78, 1.17) | 1.02 (0.93, 1.21) | 0.06                                   |
| Final model <sup>5</sup> :             | 1               | 1.01 (0.91, 1.23) | 1.05 (0.94, 1.26) | 0.06                                   |
| <b>Age at voice break (n=2495)</b>     |                 |                   |                   |                                        |
| Unadjusted model:                      | 1               | 0.94 (0.76, 1.17) | 0.99 (0.89, 1.21) | 0.08                                   |
| Model 2 <sup>6</sup> :                 | 1               | 0.97 (0.77, 1.18) | 1.03 (0.95, 1.27) | 0.07                                   |
| Final model <sup>5</sup> :             | 1               | 1.03 (0.93, 1.26) | 1.06 (0.93, 1.23) | 0.06                                   |

<sup>1</sup> Values are models adjusted hazard ratios (95% CI), HR= hazard ratio; <sup>2</sup> Values are min-max in tertiles in girls for age at Tanner stage B2: T1 (8.1-12.3), T2 (12.4-17.8), and T3 (17.9-23.1); values are min-max in tertiles in girls for age at menarche: T1 (7.8-10.9), T2 (11.0-15.2), and T3 (15.3-21.6); <sup>3</sup> P for trend across tertiles were performed by including dietary fat intake at baseline as continuous variables; <sup>4</sup> Adjusted for birth year, family income level and energy intake at baseline; <sup>5</sup> Additionally adjusted for Z-scores of BMI at baseline and dietary protein intake (residual) at baseline; <sup>6</sup> Adjusted for birth year, family income level, energy intake at baseline and mother's age at menarche; <sup>7</sup> Values are min-max in tertiles in boys: T1 (8.4-14.5), T2 (14.6-20.7), and T3 (20.8-27.2).

**Table S2.** Association<sup>1</sup> of dietary monounsaturated fatty acid (MUFA) in childhood with puberty timing.

| Dietary MUFA at baseline               |                 |                   |                   |                                        |
|----------------------------------------|-----------------|-------------------|-------------------|----------------------------------------|
|                                        | T1 <sup>2</sup> | T2 <sup>2</sup>   | T3 <sup>2</sup>   | <i>p</i> <sub>trend</sub> <sup>3</sup> |
| <b>Girls</b>                           |                 |                   |                   |                                        |
| <b>Age at Tanner stage B2 (n=2185)</b> |                 |                   |                   |                                        |
| Unadjusted model:                      | 1               | 1.07 (1.01 1.13)  | 1.09 (1.02, 1.17) | 0.04                                   |
| Model 2 <sup>4</sup> :                 | 1               | 1.06 (1.02, 1.11) | 1.10 (1.04, 1.18) | 0.04                                   |
| Final model <sup>5</sup> :             | 1               | 1.04 (0.97, 1.13) | 1.07 (0.98, 1.20) | 0.06                                   |
| <b>Age at menarche (n=3425)</b>        |                 |                   |                   |                                        |
| Unadjusted model:                      | 1               | 1.05 (0.99 1.16)  | 1.09 (1.01, 1.19) | 0.06                                   |
| Model 2 <sup>6</sup> :                 | 1               | 1.06 (1.01, 1.12) | 1.11 (1.06, 1.17) | 0.047                                  |
| Final model <sup>5</sup> :             | 1               | 0.99 (0.87, 1.16) | 1.06 (0.93, 1.21) | 0.07                                   |
| <b>Boys</b>                            |                 |                   |                   |                                        |
|                                        | T1 <sup>7</sup> | T2 <sup>7</sup>   | T3 <sup>7</sup>   | <i>p</i> <sub>trend</sub> <sup>3</sup> |
| <b>Age at Tanner stage G2 (n=2495)</b> |                 |                   |                   |                                        |
| Unadjusted model:                      | 1               | 0.93 (0.81, 1.10) | 0.97 (0.89, 1.18) | 0.07                                   |
| Model 2 <sup>6</sup> :                 | 1               | 0.99 (0.89, 1.19) | 1.03 (0.95, 1.16) | 0.06                                   |
| Final model <sup>5</sup> :             | 1               | 1.03 (0.96, 1.12) | 1.04 (0.95, 1.21) | 0.07                                   |
| <b>Age at voice break (n=2495)</b>     |                 |                   |                   |                                        |
| Unadjusted model:                      | 1               | 1.02 (0.95, 1.18) | 1.03 (0.96, 1.22) | 0.07                                   |
| Model 2 <sup>6</sup> :                 | 1               | 1.01 (0.92, 1.10) | 1.05 (0.98, 1.25) | 0.06                                   |
| Final model <sup>5</sup> :             | 1               | 1.02 (0.95, 1.16) | 1.04 (0.96, 1.23) | 0.06                                   |

<sup>1</sup> Values are models adjusted hazard ratios (95% CI), HR= hazard ratio; <sup>2</sup> Values are min-max in tertiles in girls for age at Tanner stage B2: T1 (8.5-14.8), T2 (14.9-19.3), and T3 (19.4-25.2); values are min-max in tertiles in girls for age at menarche: T1 (8.1-13.9), T2 (14.0-18.9), and T3 (19.0-24.5); <sup>3</sup> P for trend across tertiles were performed by including dietary fat intake at baseline as continuous variables; <sup>4</sup> Adjusted for birth year, family income level and energy intake at baseline; <sup>5</sup> Additionally adjusted for Z-scores of BMI at baseline and dietary protein intake (residual) at baseline; <sup>6</sup> Adjusted for birth year, family income level, energy intake at baseline and mother's age at menarche; <sup>7</sup> Values are min-max in tertiles in boys: T1 (8.7-15.1), T2 (15.2-22.6), and T3 (22.7-31.6).
